# Supplementary material
Source: PubMed Central journal article supplement (PMC7966064)
Supplement: 2540_tables.pdf [file 2540_tables.pdf]

**On-line Table 1: Clinical data of all children with Sturge-Weber syndrome**

| Patient | Gender | Age (yr) at MR Imaging | Age (yr) at First Seizure | Seizure Frequency | Last Seizure before MR Imaging | IQ <sup>a</sup> | Hemiparesis | Antiepileptic Drug |
|---------|--------|------------------------|---------------------------|-------------------|--------------------------------|-----------------|-------------|--------------------|
| 1       | M      | 7.0                    | 0.5                       | >10/day           | 2 h                            | 47.00           | Yes         | VPA, LEV           |
| 2       | F      | 2.0                    | 0.1                       | 1/yr              | >1 yr                          | 55.00           | Yes         | CBZ, PHB, CLOB     |
| 3       | F      | 10.0                   | 0.2                       | Monthly           | 1 yr                           | 55.00           | Yes         | LAM                |
| 4       | F      | 5.0                    | 0.5                       | <1/yr             | 6 mo                           | 117.00          | No          | PHB                |
| 5       | M      | 5.0                    | 5.0                       | Monthly           | 12 h                           | 99.00           | No          | PHT, LEV           |
| 6       | M      | 1.8                    | 0.7                       | 10/mo             | 2 days                         | 105.00          | No          | PHB, LEV, OXC      |
| 7       | F      | 0.8                    | 0.2                       | Few/mo            | 1 mo                           |                 | Yes         | PHB, OXC, LEV      |
| 8       | M      | 4.0                    | 3.5                       | Weekly            | 10 days                        | 110.00          | No          | OXC                |
| 9       | M      | 9.0                    | 0.6                       | 1/yr              | 9 mo                           | 93.00           | Yes         | CBZ                |
| 10      | F      | 1.6                    | 0.6                       | Few/yr            | 6 mo                           | 71.00           | Yes         | LEV, VPA           |
| 11      | M      | 1.8                    | 1.6                       | Few/yr            | 4 mo                           | 92.00           | No          | LEV                |
| 12      | F      | 2.0                    |                           | 0                 |                                | 105.00          | No          | None               |
| 13      | F      | 4.0                    | 2.0                       | <1/yr             | >1 yr                          | 102.00          | No          | LAM                |
| 14      | F      | 4.0                    | 0.1                       | <1/yr             | >1 yr                          | 91.00           | Yes         | OXC                |

<sup>a</sup> IQ was not assessed for the child (patient 7) <1 year of age.

CBZ indicates carbamazepine; CLOB, clobazam; LAM, lamotrigine; LEV, levetiracetam; OXC, oxcarbazepine; PHB, phenobarbital; VPA, valproate.

**On-line Table 2: Brain atrophy, rCBF, rCBV, and rMTT values measured in the white matter ipsi- and contralateral to the angioma<sup>a</sup>**

| Perfusion Group             | Location of Angioma | BA-AI | rCBF            |                   |               | rCBV            |                   |               | rMTT            |                   |               |
|-----------------------------|---------------------|-------|-----------------|-------------------|---------------|-----------------|-------------------|---------------|-----------------|-------------------|---------------|
|                             |                     |       | CBF Ipsilateral | CBF Contralateral | CBF-Asymmetry | CBV Ipsilateral | CBV Contralateral | CBV-Asymmetry | MTT Ipsilateral | MTT Contralateral | MTT-Asymmetry |
| 1                           | Left FPO            | -0.17 | 16.65           | 39.67             | -0.82         | 2.33            | 4.65              | -0.67         | 4.58            | 7.17              | -0.44         |
| 1                           | Left FPTO           | -0.35 | 44.49           | 58.84             | -0.28         | 4.77            | 5.41              | -0.13         | 5.65            | 5.75              | -0.02         |
| 1                           | Left FTPO           | -0.23 | 29.04           | 58.42             | -0.67         | 3.33            | 5.68              | -0.52         | 3.46            | 5.95              | -0.53         |
| 1                           | Left TO             | -0.13 | 22.16           | 32.87             | -0.39         | 3.49            | 4.88              | -0.33         | 7.48            | 9.02              | -0.19         |
| 1                           | Right PO            | -0.05 | 35.08           | 41.26             | -0.16         | 3.96            | 3.87              | 0.02          | 7.46            | 5.67              | 0.27          |
| 1                           | Left PTO            | -0.13 | 30.77           | 49.03             | -0.46         | 2.31            | 2.93              | -0.24         | 1.22            | 3.63              | -0.99         |
| 1                           | Right FPTO          | -0.21 | 64.57           | 77.80             | -0.19         | 5.82            | 6.27              | -0.07         | 5.57            | 4.99              | 0.11          |
| 1                           | Left PO             | -0.03 | 50.24           | 56.56             | -0.12         | 4.88            | 5.31              | -0.08         | 5.91            | 5.71              | 0.04          |
| 1                           | Left P              | -0.07 | 20.17           | 25.14             | -0.22         | 1.08            | 1.03              | 0.05          | 3.19            | 2.64              | 0.19          |
| 2                           | Right FPTO          | -0.11 | 63.05           | 42.52             | 0.39          | 6.11            | 2.97              | 0.69          | 5.83            | 4.36              | 0.29          |
| 2                           | Right PTO           | -0.04 | 20.40           | 14.70             | 0.32          | 6.00            | 4.38              | 0.31          | 17.64           | 17.57             | 0.00          |
| 2                           | Left PTO            | 0.01  | 19.66           | 15.11             | 0.26          | 5.73            | 4.52              | 0.24          | 17.85           | 18.14             | -0.02         |
| 2                           | Left P              | 0.01  | 84.04           | 62.13             | 0.30          | 6.92            | 4.56              | 0.41          | 5.18            | 4.60              | 0.12          |
| 2                           | Left FP             | -0.07 | 55.03           | 41.02             | 0.29          | 5.21            | 3.58              | 0.37          | 6.00            | 5.64              | 0.06          |
| <i>P</i> value <sup>a</sup> |                     | .01   | .46             | .32               | <.001         | .01             | .21               | <.001         | .10             | .74               | .21           |

<sup>a</sup> *P* values were calculated by comparison of variables (using Mann-Whitney U-test) between low-perfusion (group 1) and high-perfusion (group 2) subgroups, based on CBF asymmetries comparing sides ipsi- versus contralateral to the angioma.

FP indicates frontal and parietal lobe; FPO, frontal, parietal and occipital lobe; FPTO, frontal, parietal, temporal and occipital lobe; P = parietal lobe; PO, parietal and occipital lobe; PTO, parietal, temporal and occipital lobe; TO, temporal and occipital lobe.
